# Supplementary material for: Horse Behavior towards Familiar and Unfamiliar Humans: Implications for Equine-Assisted Services
Source: MDPI journal article supplement (doi:10.3390/ani11082369), 2021-08-11
Supplement: s1 [file s1]

**Horse Name:**\_\_\_\_\_

**Folder/Video:**\_\_\_\_\_

**Sociability Test**

**1. Familiar**

*Put a checkmark in the box that best describes the horse's behavior during the video (check only one box).*

|                                                                                                                                       |    |
|---------------------------------------------------------------------------------------------------------------------------------------|----|
| Horse orients toward, approaches, and makes affiliative contact (nuzzling, etc) with familiar person                                  | A. |
| Horse orients toward and approaches familiar person within arm's reach, but does not initiate contact                                 | B. |
| Horse orients with whole body and approaches familiar person but does not come within arm's reach                                     | C. |
| No approach to familiar person, however orients head towards familiar person; foraging and/or exploration behaviors OR stands quietly | D. |
| Horse does not approach or orient towards familiar person; foraging and/or exploration behaviors                                      | E. |
| Horse does not approach familiar person; exhibits freezing and vocalizing while standing or walking                                   | F. |
| Horse does not approach familiar person; active avoidance or fearful behavior, vocalizing while trotting or cantering                 | G. |

*For "A", add 3 points*

*For "B," add 2 points*

*For "C," add 1 point*

*For "D," add 0 points*

*For "E," subtract 1 point*

*For "F," subtract 2 points*

*For "G," subtract 3 points*

**1. Score:**\_\_\_\_\_

## 2. Unfamiliar

Put a checkmark in the box that best describes the horse's behavior during the video (check only one box).

|                                                                                                                                            |    |
|--------------------------------------------------------------------------------------------------------------------------------------------|----|
| Horse orients toward, approaches, and makes affiliative contact (nuzzling, etc) with unfamiliar person                                     | A. |
| Horse orients towards and approaches unfamiliar person within arm's reach, but does not initiate contact                                   | B. |
| Horse orients with whole body and approaches unfamiliar person but does not come within arm's reach                                        | C. |
| No approach to unfamiliar person, however orients head towards unfamiliar person; foraging and/or exploration behaviors, or stands quietly | D. |
| Horse does not approach or orient towards unfamiliar person; foraging and/or exploration behaviors                                         | E. |
| Horse does not approach unfamiliar person; exhibits freezing and vocalizing while standing or walking                                      | F. |
| Horse does not approach unfamiliar person; active avoidance or fearful behavior, vocalizing while trotting or cantering                    | G. |

*For "A", add 3 points*

*For "B," add 2 points*

*For "C," add 1 point*

*For "D," add 0 points*

*For "E," subtract 1 point*

*For "F," subtract 2 points*

*For "G," subtract 3 points*

2. Score:\_\_\_\_\_

### 3. Alone

Put a checkmark in the box if the horse engages in the behavior **at any point** during the test. Check all that apply- you may check multiple boxes.

|                                                                                                        |    |
|--------------------------------------------------------------------------------------------------------|----|
| Horse engages in forage and exploration, may move around in a relaxed fashion                          | A. |
| Horse moves around pen in relaxed fashion, but does not forage                                         | B. |
| Horse is neutral and calm, does not move around pen                                                    | C. |
| Horse has increased vigilance, less relaxed, however may still engage in some foraging and exploration | D. |
| Stands or walks around pen, vocalizes and/or freezes                                                   | E. |
| Trots or canters around pen; may vocalize and/or exhibit freezing                                      | F. |

For "A," add 3 points

For "B," add 2 point

For "C," add 1 point

For "D," subtract 1 points

For "E," subtract 2 points

For "F," subtract 3 points

3. Score:\_\_\_\_\_

#### 4. Preference Assessment

Put a checkmark in the box that best describes the horse's behavior during the video (check only one box).

|                                                                                                                  |    |
|------------------------------------------------------------------------------------------------------------------|----|
| Horse approaches unfamiliar person first and within the first minute of the session                              | A. |
| Horse approaches unfamiliar person first but after the first minute of the session                               | B. |
| Horse approaches familiar person first and within the first minute of the session                                | C. |
| Horse approaches familiar person first but after the first minute of the session                                 | D. |
| Horse orients toward either familiar or unfamiliar person or both, but does not approach either person           | E. |
| Horse does not approach either person; freezing/ vocalizing while standing or walking                            | F. |
| Horse does not approach either person; active avoidance/fearful behavior, vocalizing while trotting or cantering | G. |

*For "A", add 3 points*

*For "B," add 2 points*

*For "C," add 1 point*

*For "D," add 0 points*

*For "E," subtract 1 point*

*For "F," subtract 2 points*

*For "G," subtract 3 points*

4. Score: \_\_\_\_\_

## 5. Brushing

Put a checkmark in the box that best describes the horse's behavior during the video (check only one box).

|                                                                                                                                  |    |
|----------------------------------------------------------------------------------------------------------------------------------|----|
| Displays affiliative behavior toward person brushing and handler                                                                 | A. |
| Displays affiliative behavior toward person brushing only                                                                        | B. |
| Displays affiliative behavior toward handler only                                                                                | C. |
| No reaction/netural; does not exhibit obvious pro-social behavior, vigilance, or avoidance/fear behavior                         | D. |
| Displays intermediate vigilance and/or herd seeking behavior; no other signs of avoidance/fear; may display panniculus reflex    | E. |
| Attempts to move away from, or increase distance between, itself and person brushing; may display panniculus reflex              | F. |
| Active avoidance/fear; attempts to move away from person and/or handler, or displays aggressive behavior in response to brushing | G. |

*For "A", add 3 points*

*For "B," add 2 points*

*For "C," add 1 point*

*For "D," add 0 points*

*For "E," subtract 1 point*

*For "F," subtract 2 points*

*For "G," subtract 3 points*

5. Score: \_\_\_\_\_

## 6. Bucket and Rug Test

Put a checkmark in the box that best describes the horse's behavior during the video (check only one box).

|                                                                    |    |
|--------------------------------------------------------------------|----|
| Readily crosses rug without encouragement, eats food from bucket   | A. |
| Makes contact with rug, pauses, then crosses independently         | B. |
| Crosses rug/bucket only after encouragement                        | C. |
| Steps on and/or sniffs rug but does not cross over to obtain treat | D. |
| Ignores/avoids bucket and rug                                      | E. |
| Spooks at rug, may cross rug but only after encouragement          | F. |
| Actively flees from rug, does not cross                            | G. |

For "A", add 3 points

For "B," add 2 points

For "C," add 1 point

For "D," add 0 points

For "E," subtract 1 point

For "F," subtract 2 points

For "G," subtract 3 points

6.

Score:\_\_\_\_\_

## 7. Umbrella

Put a checkmark in the box if the horse engages in the behavior **at any point** during the test. Check all that apply- you may check multiple boxes.

|                                                                                        |    |
|----------------------------------------------------------------------------------------|----|
| Pushes and/or picks up umbrella and/or plays with umbrella                             | A. |
| Makes contact with umbrella                                                            | B. |
| Comes within a body length of umbrella                                                 | C. |
| Readily approaches umbrella                                                            | D. |
| Watches umbrella with relaxed body posture                                             | E. |
| No reaction in response to umbrella                                                    | F. |
| Engages in exploration and/or foraging in other areas of pen while umbrella is present | G. |
| Blows or snorts in the direction of umbrella                                           | H. |
| Startles (jumps) – For the 1st time                                                    | I. |
| Startles (jumps) - 2nd time (no additional checks needed for additional startles)      | J. |
| Vocalizes (neighs, whinnies, etc)                                                      | K. |
| Freezes or remains in fixed position in response to umbrella                           | L. |
| Runs or flees in response to umbrella                                                  | M. |

For A, add 3 points

For B add 3 points

For C, add 2 points

For D, add 1 point

For E, add 1 point

For F, add 0 points

For G, add 0 points

For H, subtract 1 point

For I, subtract 1 point

For J, subtract 1 point

For K, subtract 2 points

For L, subtract 2 points

For M, subtract 3 points

7. Score: \_\_\_\_\_

|                           |                           |  |
|---------------------------|---------------------------|--|
| <b>Sociability Score:</b> | Add Scores 1, 2, 4, and 5 |  |
| <b>Boldness Score:</b>    | Add Scores 3, 6, and 7    |  |
